# Supplementary material for: The anti-fatigue effect of theAuxis thazardoligopeptideviamodulation of the AMPK/PGC-1α pathway in mice
Source: Royal Society of Chemistry journal article supplement (doi:10.1039/d1fo03320d), 2022-01-01
Supplement: d1fo03320d1.pdf [file d1fo03320d1.pdf]

Table 1 Molecular weight distribution of ATO

| molecular weight(Da) | retention time(min) | peak area(%) |
|----------------------|---------------------|--------------|
| >1000                | 12.587              | 4.54         |
| 1000-500             | 20.404              | 28.41        |
| 500-180              | 22.136              | 61.15        |
| <180                 | 23.978              | 5.90         |

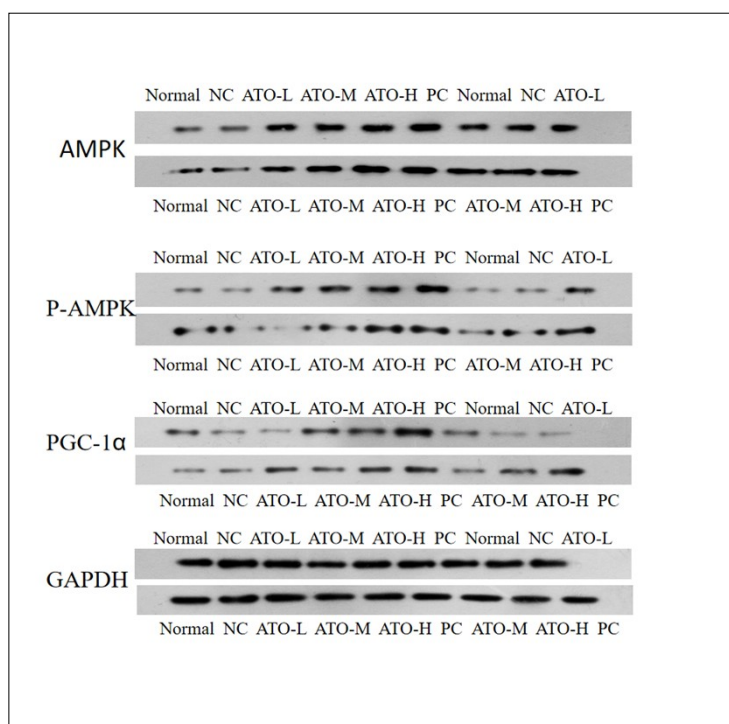

Fig.1 Western blot of AMPK、 P-AMPK、 PGC-1 $\alpha$ 、 GAPDH

Supplementary note: The group corresponding to each protein band is shown in

Figure 1.
